# Supplementary material for: Effect of birthweight measurement quality improvement on low birthweight prevalence in rural Ethiopia
Source: Springer Nature journal article supplement (doi:10.1186/s12963-021-00265-0), 2021-09-22
Supplement: MOESM1 [file 19687358]

**Additional file 1: Health centres selected for Phase 1&2 studies (pre- and post-QI) in rural Ethiopia**

**Table 1: Health centers selected for Phase 1 study (Pre-QI) in rural Ethiopia**

| <b>Zones</b> | <b>Districts</b>                    | <b>Health Centers</b>                                        |
|--------------|-------------------------------------|--------------------------------------------------------------|
| West Gojjam  | North Achefer<br>South Achefer      | Blen<br>Yismala<br>Ashuda<br>Yeboden                         |
| South Gondar | Ebinat<br>Lay Gayint<br>Tach Gayint | Selamaya<br>Wergaja<br>Checheho<br>Gobegob<br>Agate<br>Aketo |
| North Wollo  | Meket<br>Bugna                      | Debre Zebit<br>Serko<br>Birko<br>Kob                         |

**Table 2: Health centers selected for Phase 2 study (Post-QI) in rural Ethiopia**

| <b>Zones</b> | <b>Districts</b>               | <b>Health Centers</b>                                                           |
|--------------|--------------------------------|---------------------------------------------------------------------------------|
| West Gojjam  | North Achefer<br>South Achefer | Legdiya<br>Qunzela<br>Forhe Sankra<br>Yismala<br>Lalibela                       |
| South Gondar | Dera<br>Libokemkem             | Anbessamie<br>Arb Gebaya<br>Geladiwos<br>Korata<br>Wanzaye<br>Yifag<br>Ambomeda |
