# Supplementary material for: Effect of birthweight measurement quality improvement on low birthweight prevalence in rural Ethiopia
Source: Springer Nature journal article supplement (doi:10.1186/s12963-021-00265-0), 2021-09-22
Supplement: MOESM2 [file 19687358]

## Additional file 2: Job aids posted on the delivery room walls

# INFANT WEIGHING

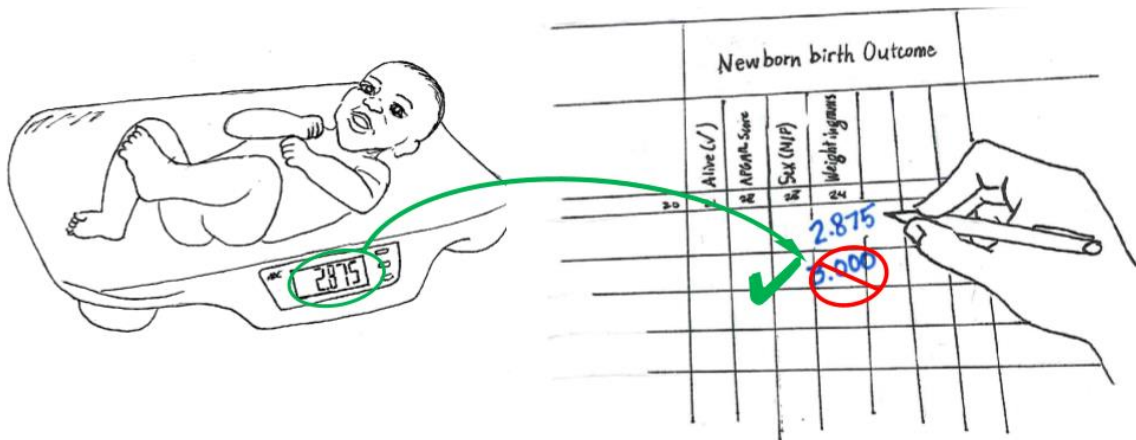

- ✓ Please precisely **record all four numbers** on the scale, **do NOT round up or down**
- ✓ Baby should be weighed **NAKED**, without any clothing/blankets on
- ✓ It is important to weigh and record weights on **ALL** babies born, even premature <28 or stillborn

## WEIGHING WITH A BLANKET

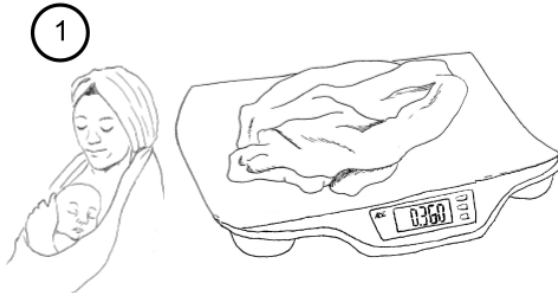

Unwrap infant and keep warm on mother's skin while you place the blanket on the scale **FIRST** before weighing the infant

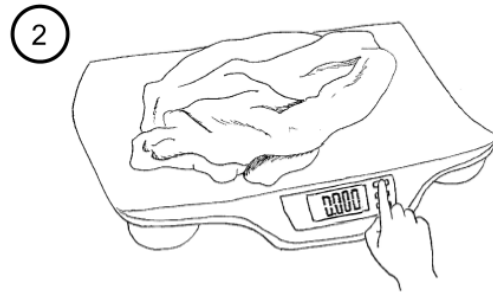

With a single finger, press the **ON/TARE** button to set the scale to **0.000**

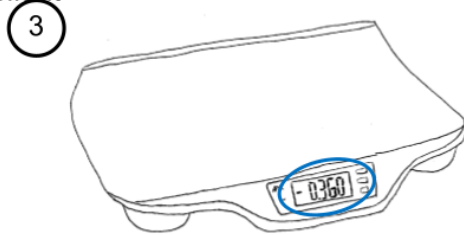

Now remove the blanket and the scale will remain **NEGATIVE** the weight of the blanket for several minutes

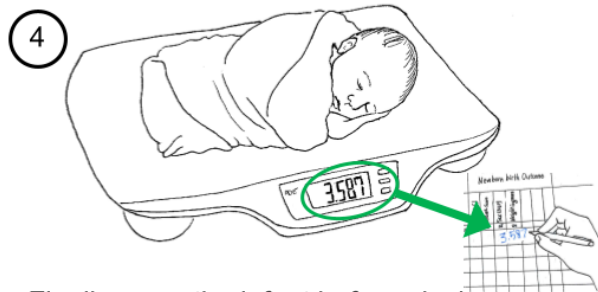

Finally, wrap the infant before placing on the scale and **record the weight** it reads
